# Supplementary material for: QTL mapping of egg albumen quality in egg layers
Source: PubMed Central journal article supplement (PMC3847062; doi:10.1186/1297-9686-45-31), 2013-08-16
Supplement: 1297-9686-45-31-S1.pdf [file 1297-9686-45-31-S1.pdf]

**HU**

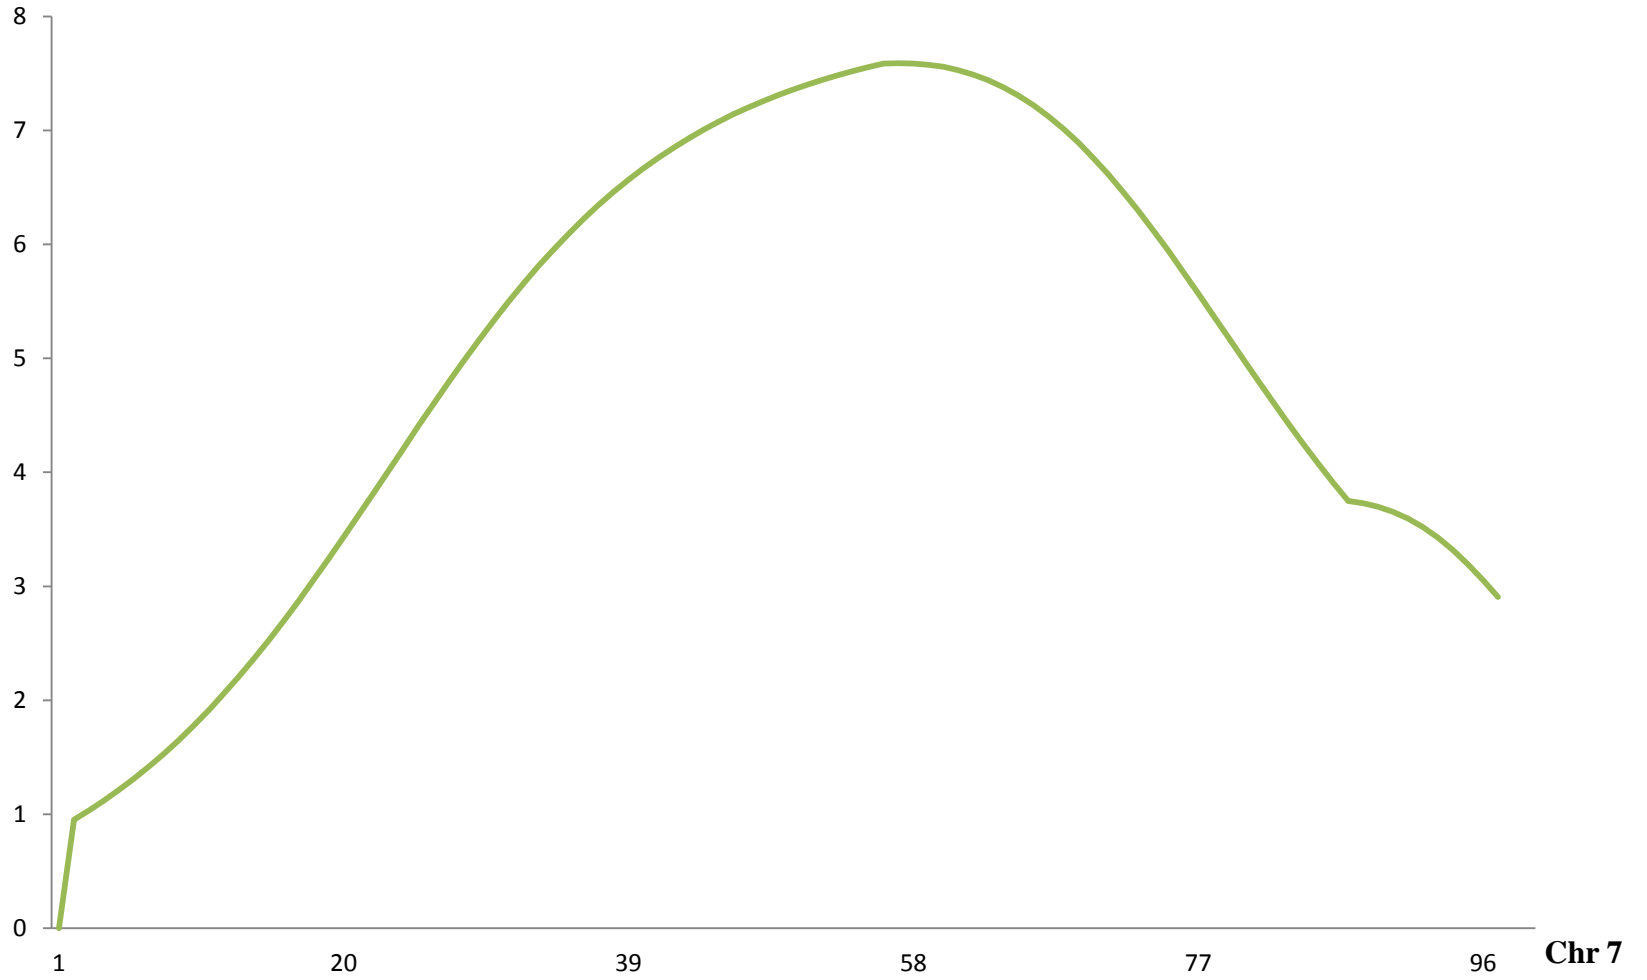

**HU**

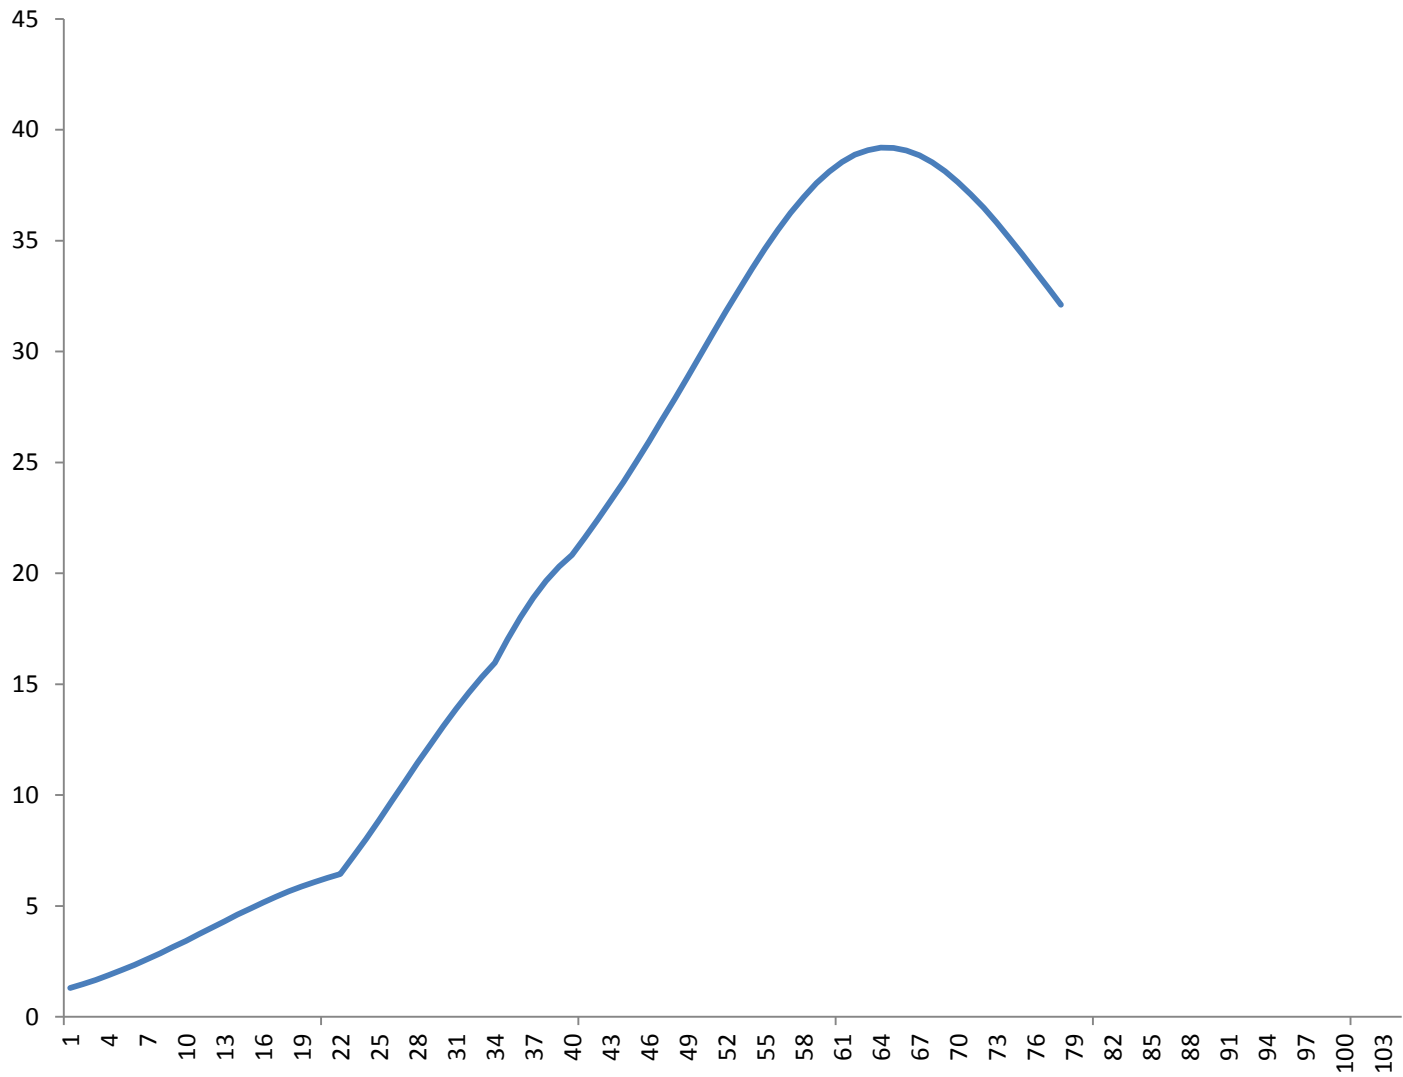

**Chr Z**
