# Supplementary material for: QTL mapping of egg albumen quality in egg layers
Source: PubMed Central journal article supplement (PMC3847062; doi:10.1186/1297-9686-45-31), 2013-08-16

Marker: ADL326, Phenotype: Early

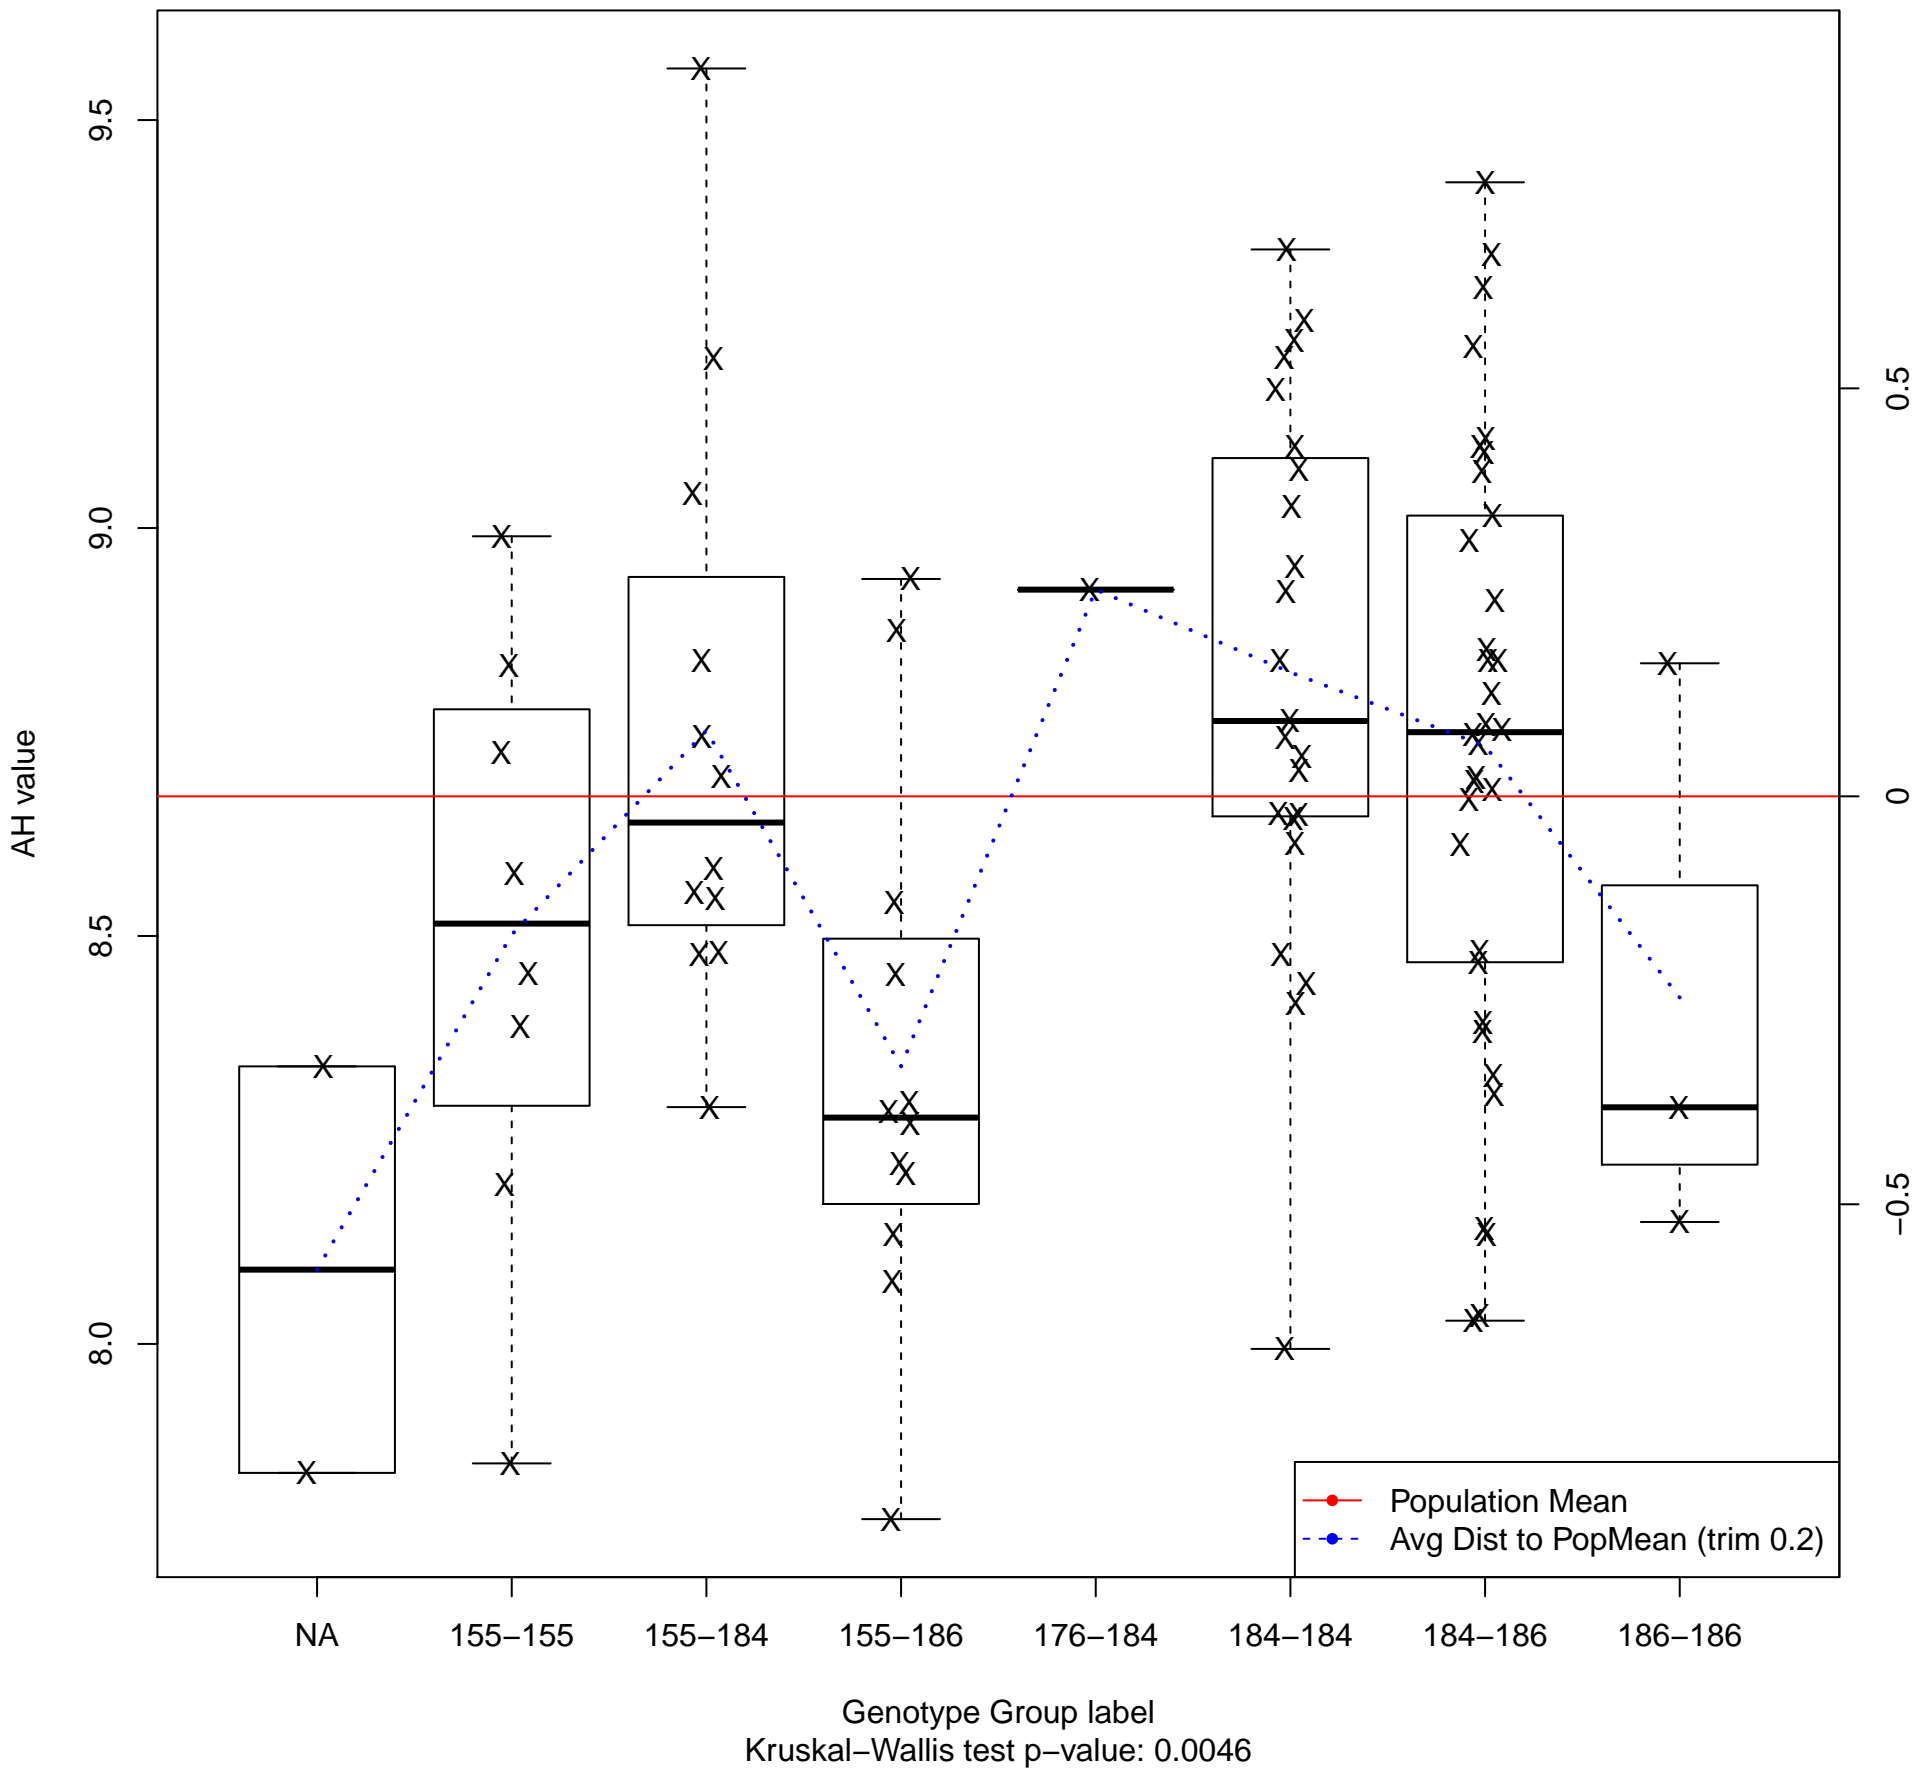

Marker: MCW183, Phenotype: Early

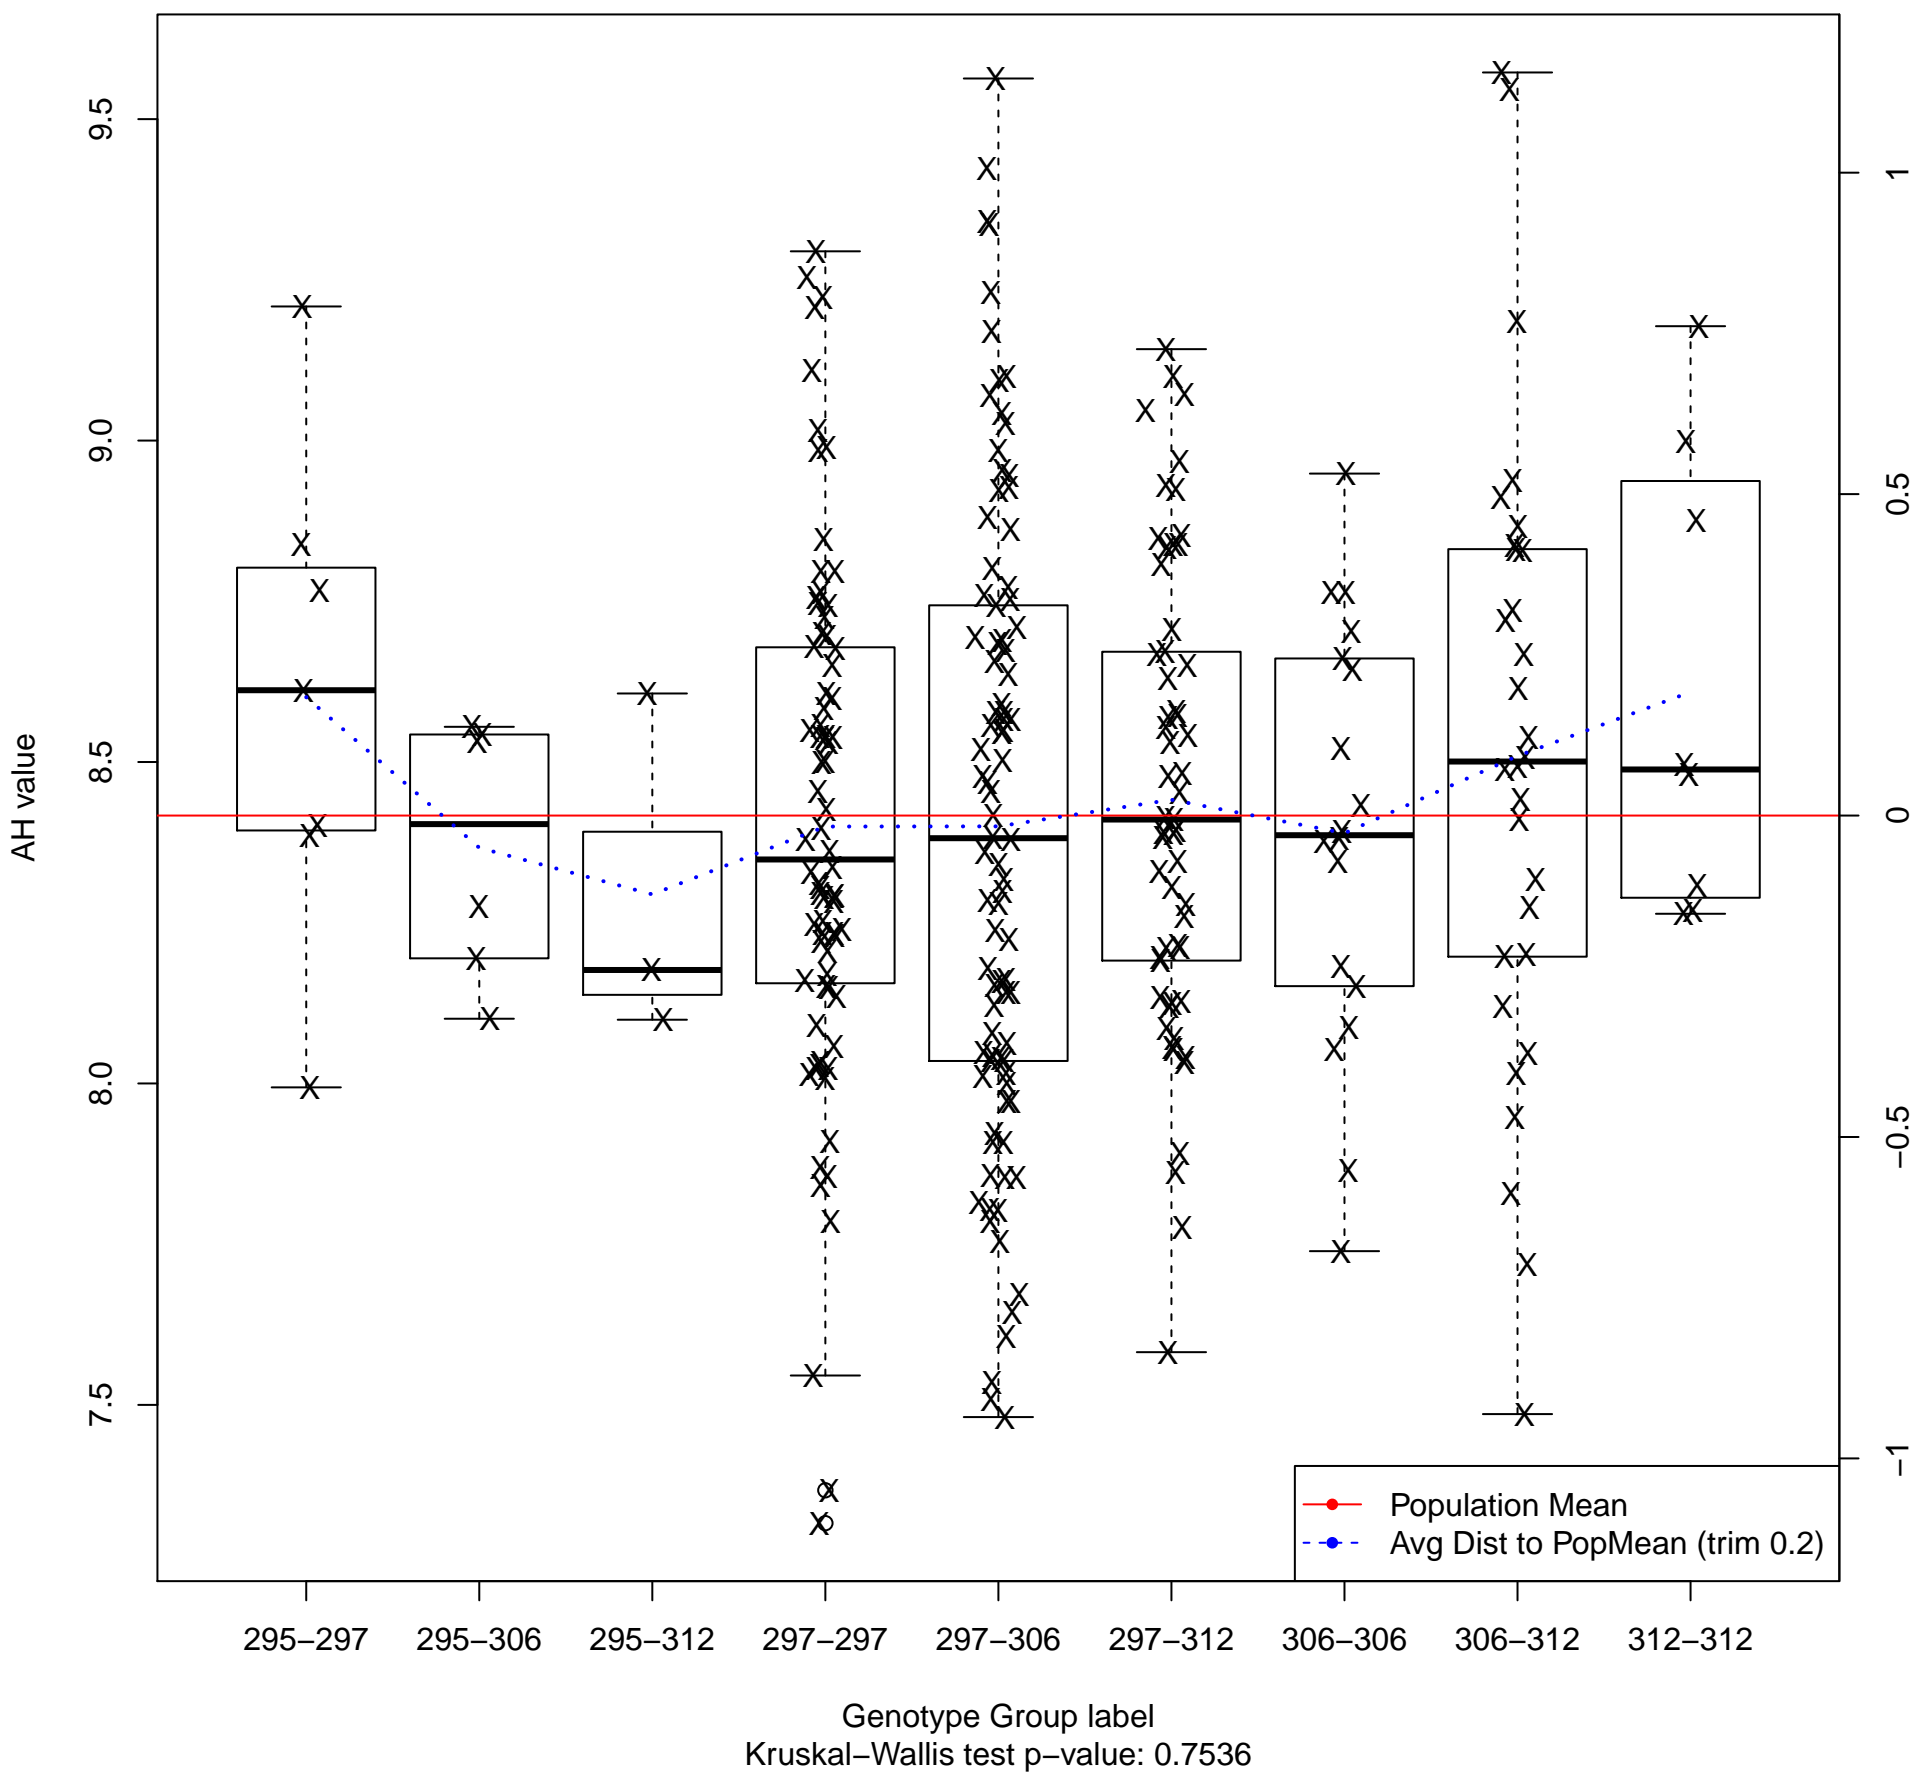

Marker: MCW236, Phenotype: Early

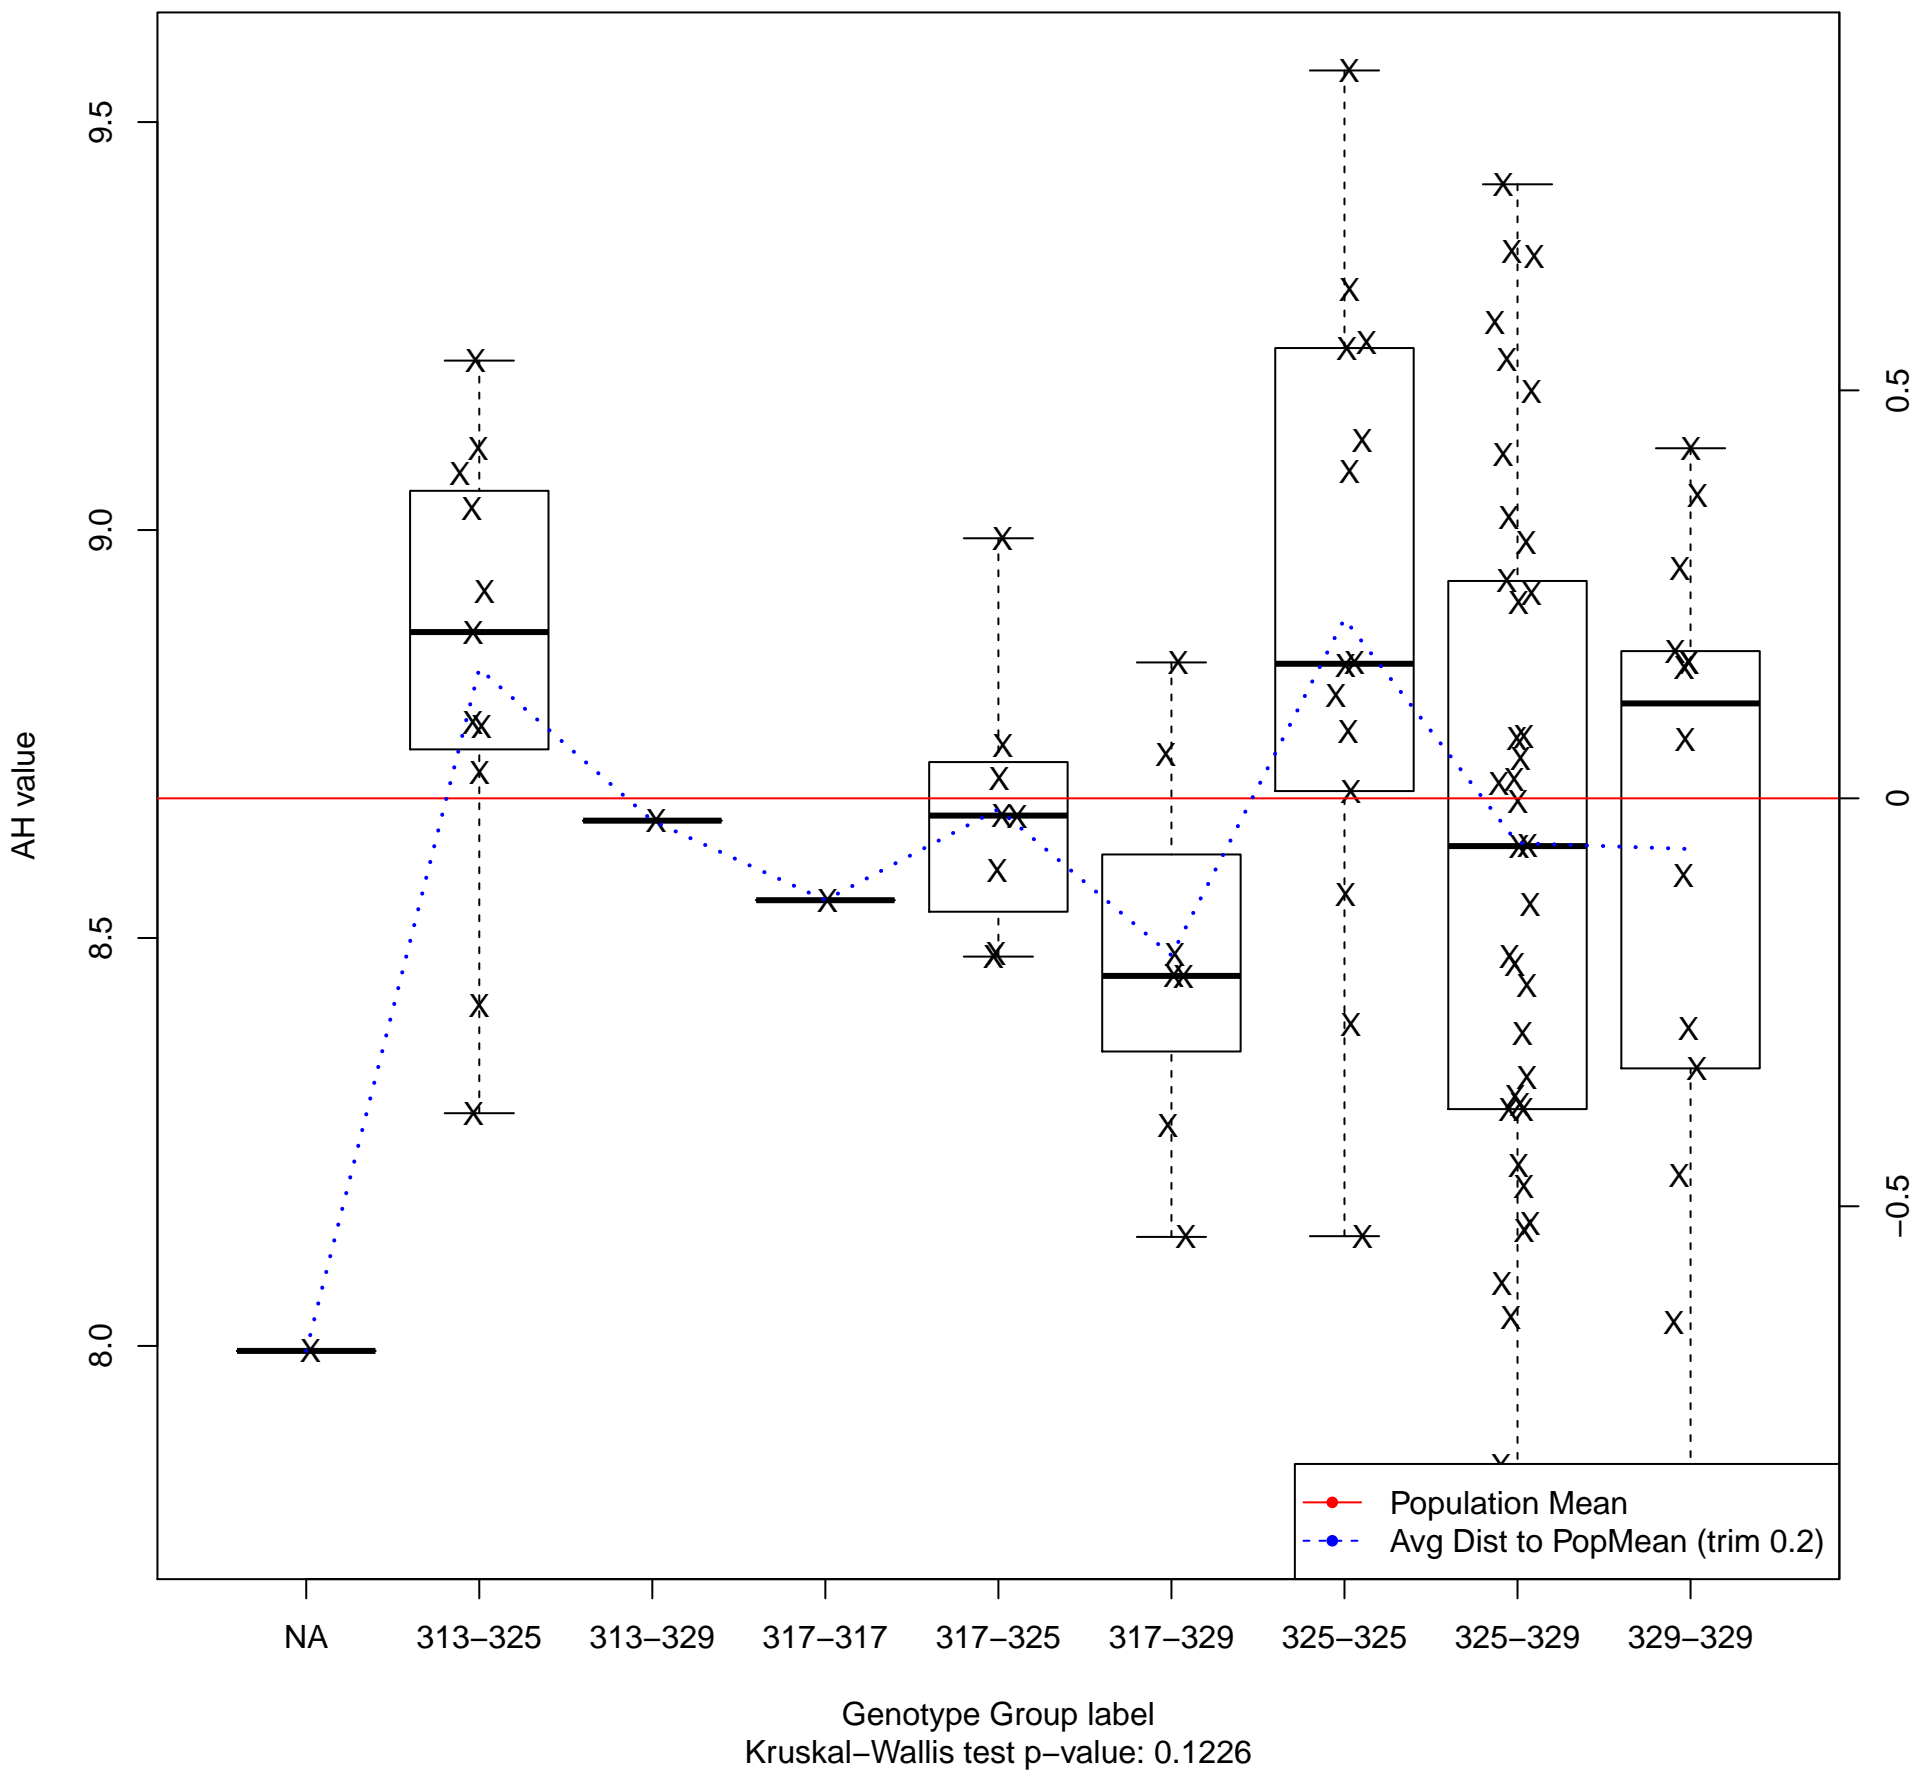

# Marker: ADL326, Phenotype: Late

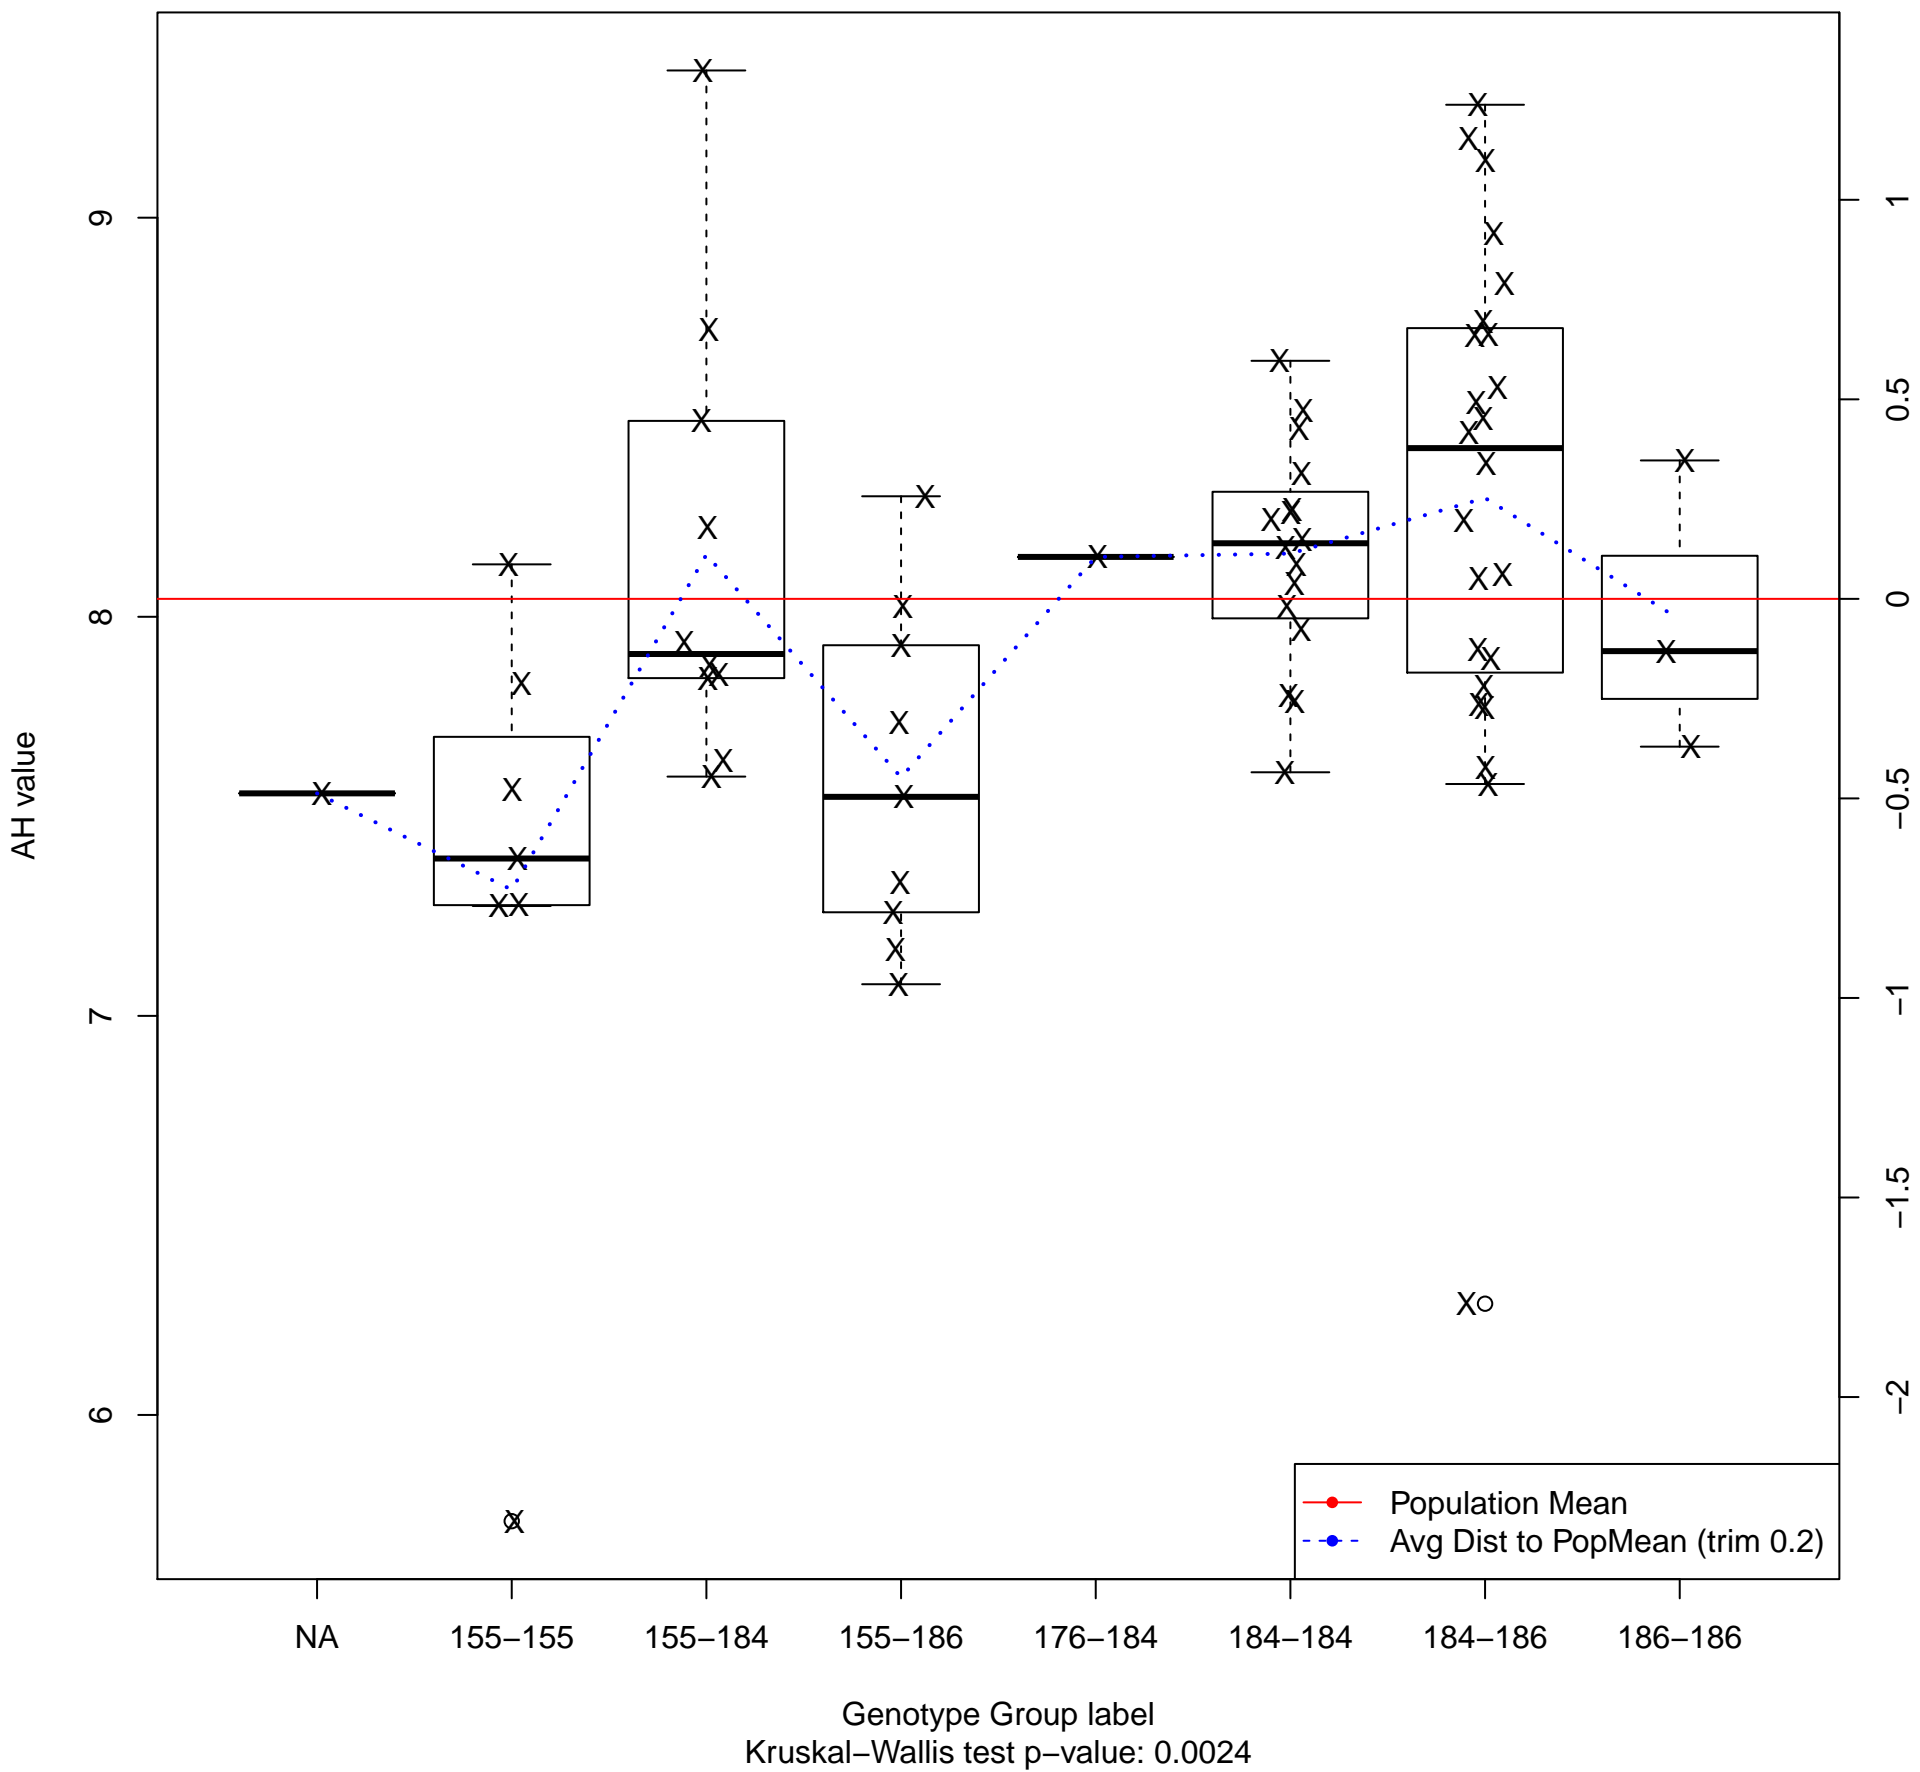

Marker: MCW183, Phenotype: Late

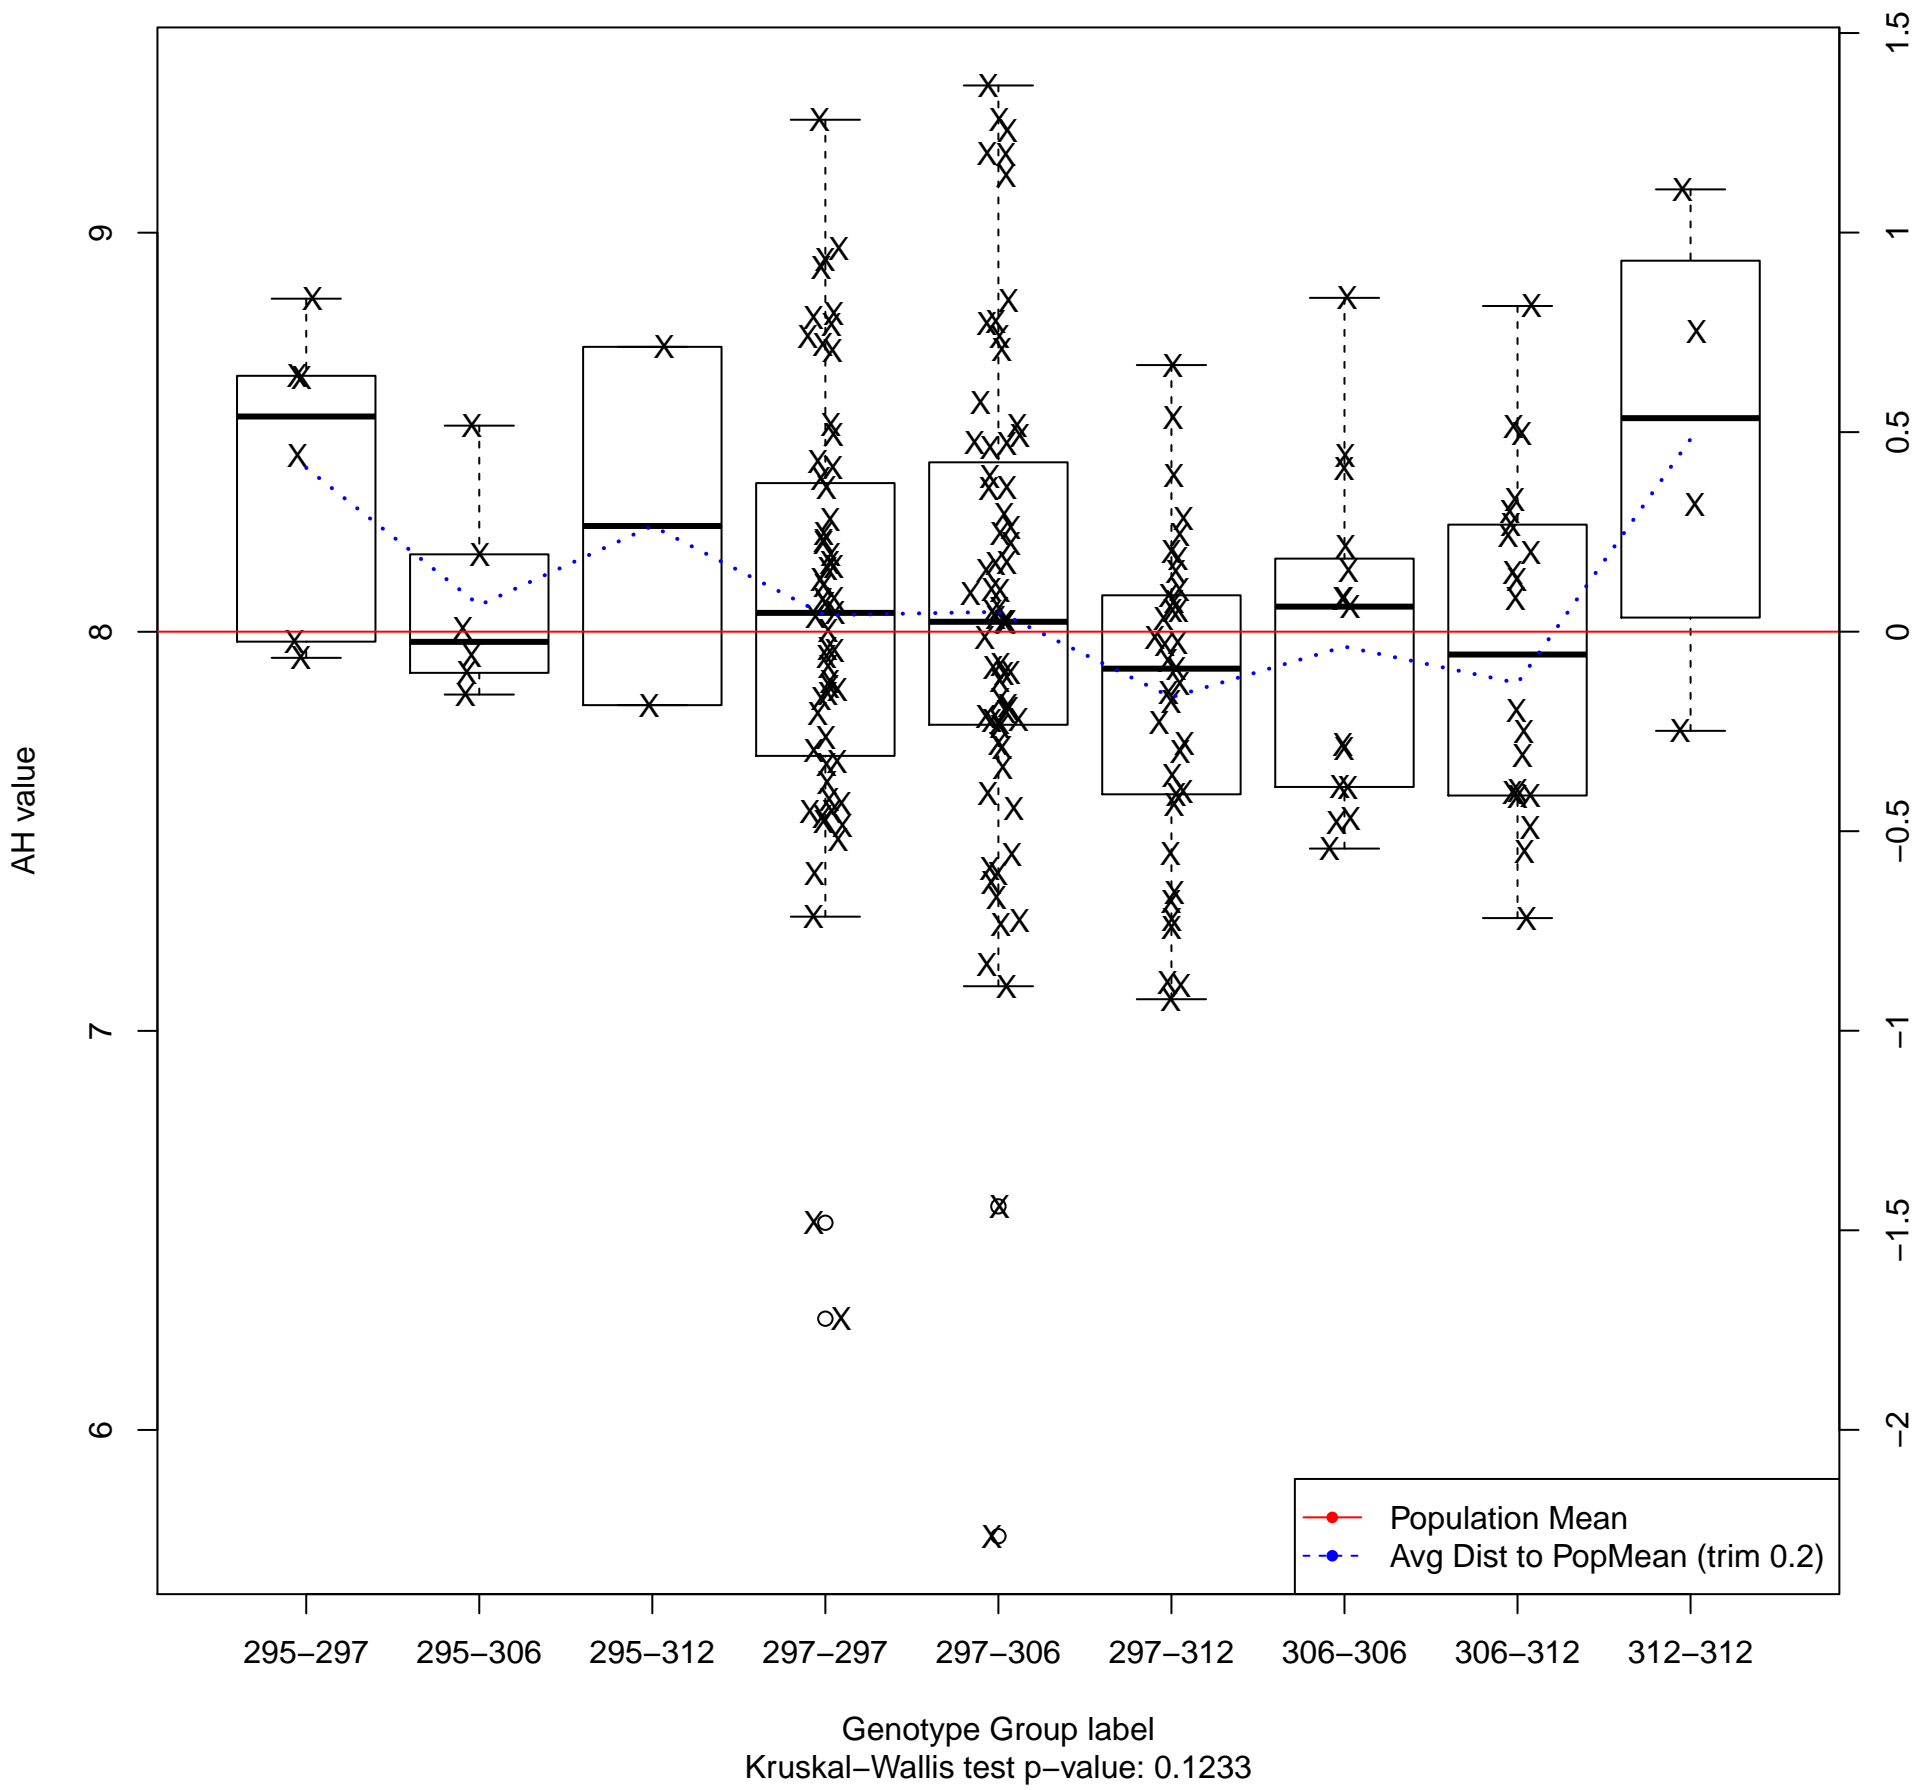

Marker: MCW236, Phenotype: Late

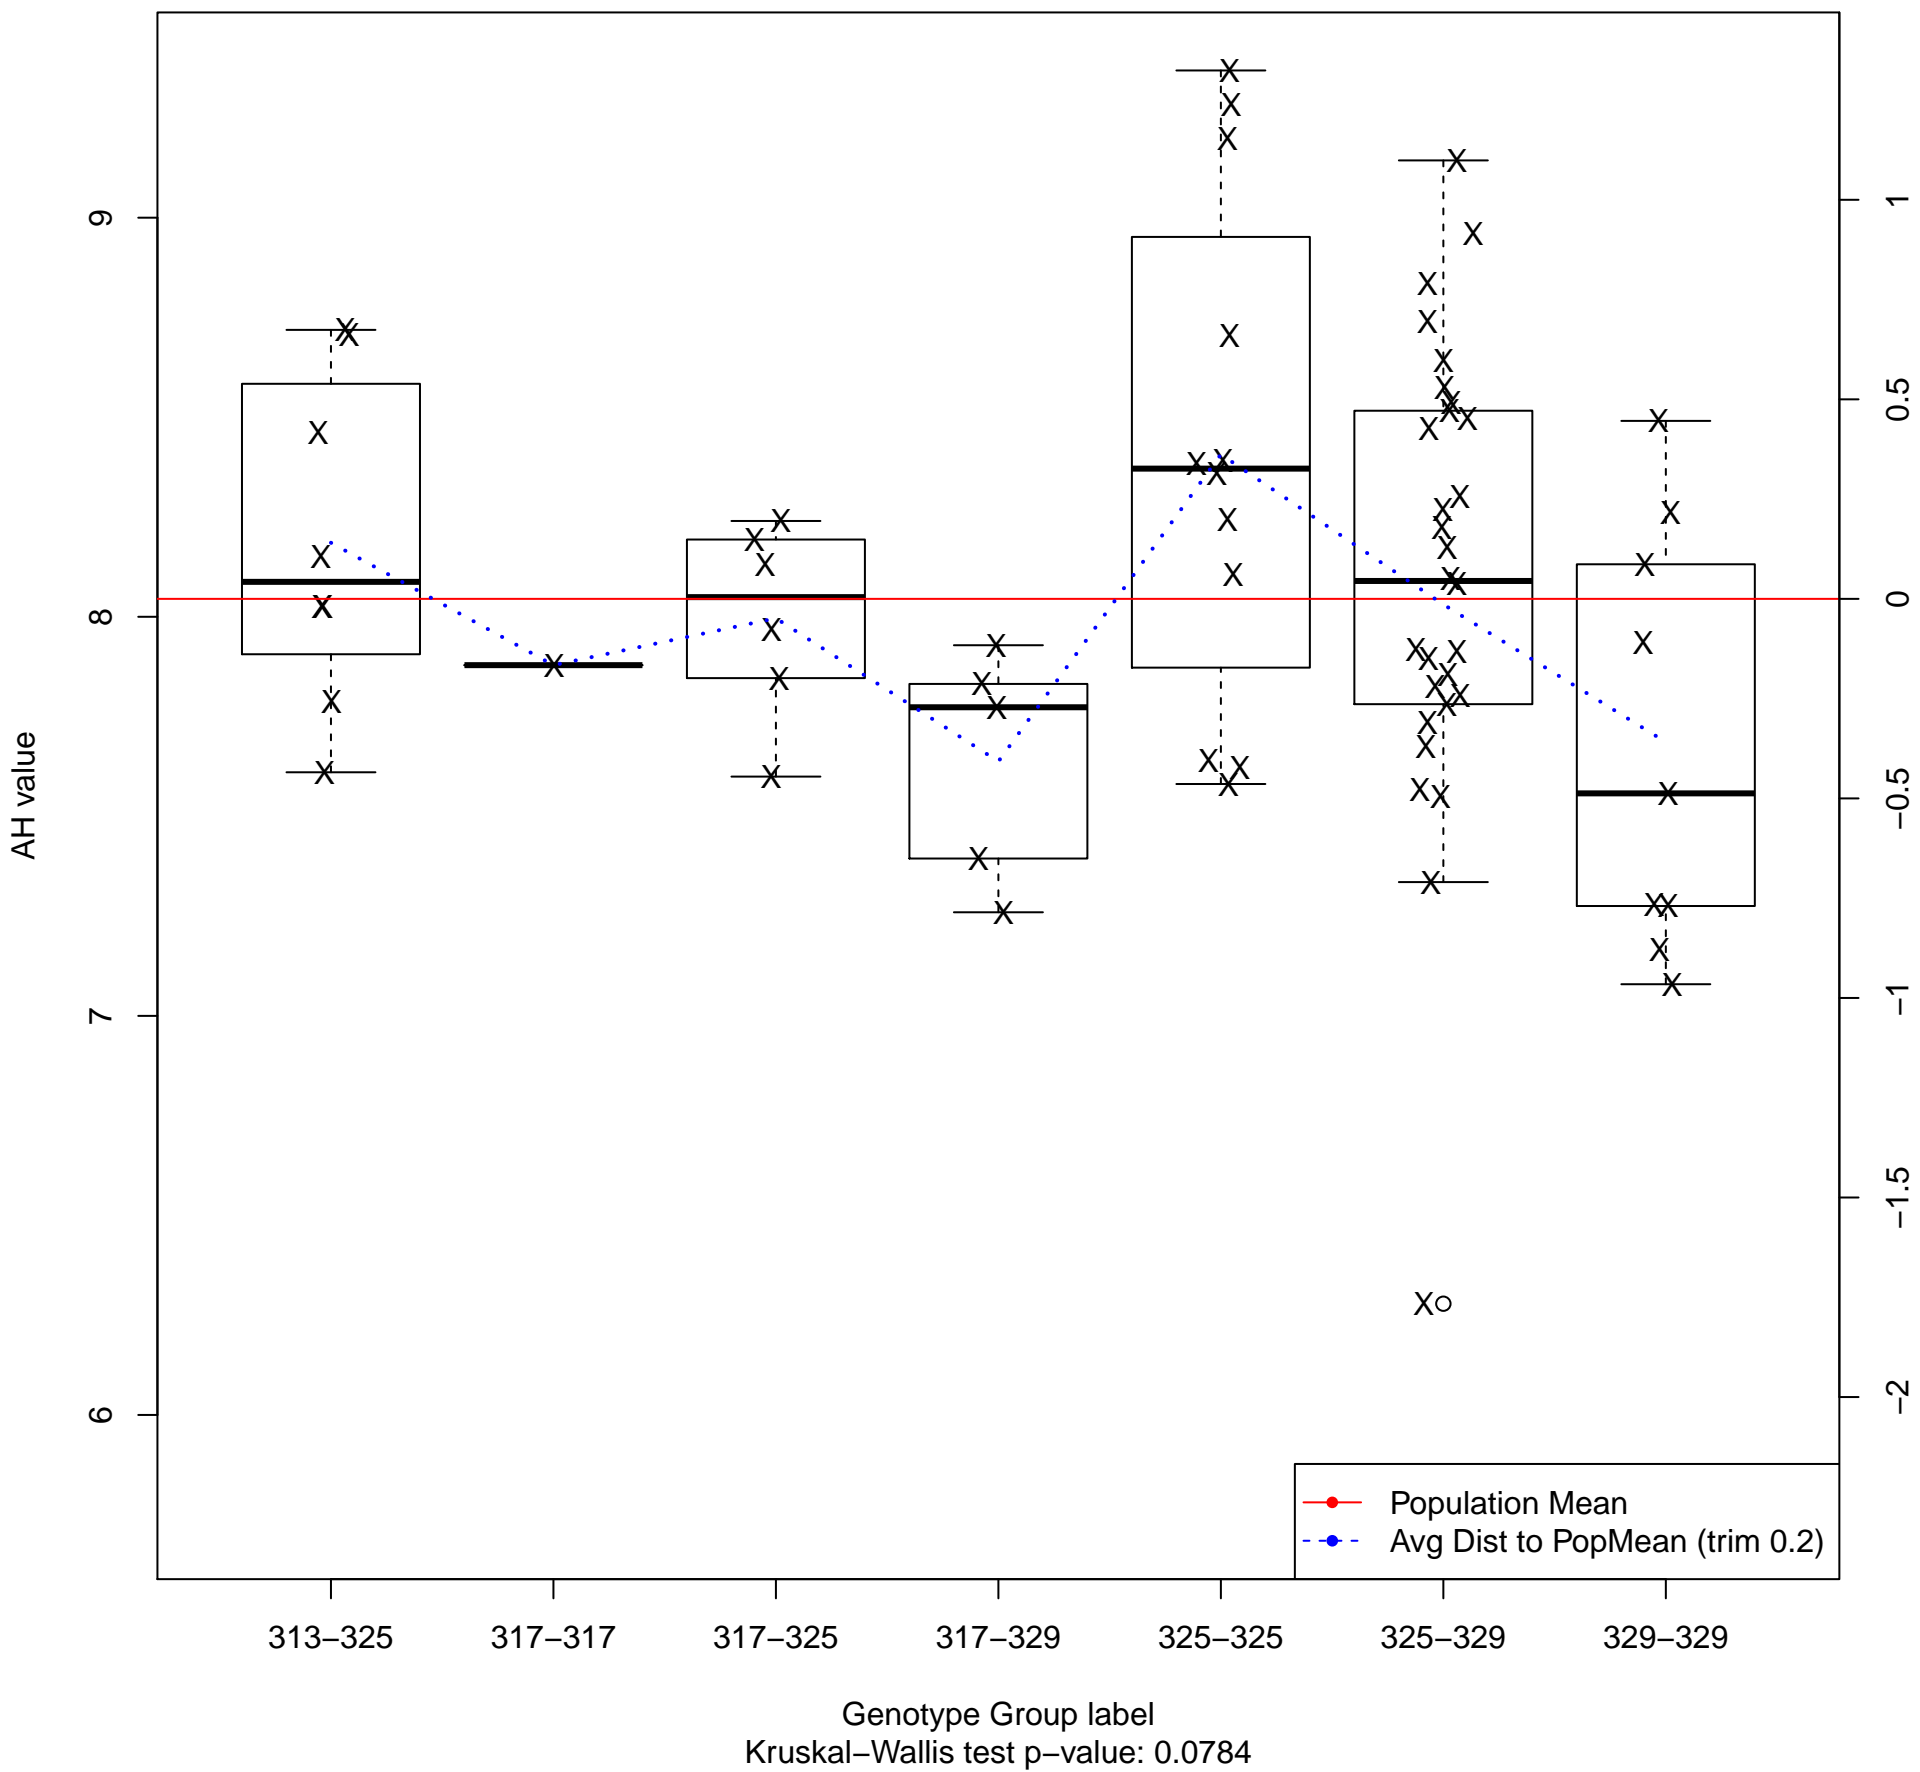

Supplement: 1297-9686-45-31-S2.pdf [file 1297-9686-45-31-S2.pdf]
